# Supplementary material for: Direct conversion of methane to value-added hydrocarbons using hybrid catalysts of Ni/Al2O3 and K–Co/Al2O3
Source: Royal Society of Chemistry journal article supplement (doi:10.1039/d3re00055a), 2023-01-01
Supplement: d3re00055a1.pdf [file d3re00055a1.pdf]

**Supplementary material for:**  
**Direct Conversion of Methane to Value-added  
Hydrocarbons Using Hybrid Catalysts of Ni/Al<sub>2</sub>O<sub>3</sub>  
and K-Co/Al<sub>2</sub>O<sub>3</sub>**

*Thitiwut Sukprom<sup>1</sup>, Pooripong Somchuea<sup>1</sup>, Sarannuch Sringam<sup>1,2</sup>,  
Thongthai Witoon<sup>1,2</sup>, Metta Chareonpanich<sup>1,2</sup>, Pawin Iamprasertkun<sup>3</sup>,  
Kajornsak Faungnawakij<sup>4</sup>, Günther Rupprechter<sup>5</sup>, Anusorn Seubsai<sup>1,2\*</sup>*

<sup>1</sup> *Department of Chemical Engineering, Faculty of Engineering,  
Kasetsart University, Bangkok 10900, Thailand*

<sup>2</sup> *Center of Excellence on Petrochemical and Materials Technology,  
Kasetsart University, Bangkok 10900, Thailand*

<sup>3</sup> *School of Bio-Chemical Engineering and Technology, Sirindhorn  
International Institute of Technology, Thammasat University, Pathum  
Thani, Thailand*

<sup>4</sup> *Nanomaterials for Energy and Catalysis Laboratory, National  
Nanotechnology Center (NANOTEC), National Science and Technology  
Development Agency (NSTDA), Pathum Thani 12120, Thailand*

<sup>5</sup> *Institute of Materials Chemistry, Technische Universität Wien,  
Getreidemarkt 9/BC, Vienna, 1060, Austria*

**\*Corresponding author: [fengasn@ku.ac.th](mailto:fengasn@ku.ac.th)**

## Methodology for making standard calibration curves

- 1) Premixed standard gases—containing CH<sub>4</sub>, C<sub>2</sub>H<sub>4</sub>, C<sub>2</sub>H<sub>6</sub>, C<sub>3</sub>H<sub>6</sub>, C<sub>3</sub>H<sub>8</sub>, n-C<sub>4</sub>H<sub>10</sub>, iso-C<sub>4</sub>H<sub>10</sub>, CO, and CO<sub>2</sub>—in a gas cylinder at 15 bars and ultra-high purity H<sub>2</sub> (99.999% purity) in a gas cylinder at 165 bars were purchased from Air LIQUID (Thailand) (see Table S1).
- 2) The premixed standard gases and H<sub>2</sub> were transferred to a gas sampling bag.
- 3) Five different volumes of the premixed standard gases and H<sub>2</sub> were injected into the gas chromatography (GC) using a gas syringe. The amount of the premixed gases and H<sub>2</sub> are shown in Table S1. The GC conditions are described in section “2.2 Catalytic activity test” of the main article.
- 4) Each GC peak from the flame ionization detector (FID) and thermal conductivity detector (TCD) signals was identified by comparing it with the known peaks from the “System Gas Chromatography (GC) Data Sheet” by Shimadzu or similar. Examples of GC chromatograms (both TCD and FID signals) of the standard gases and the effluents from the reaction are shown in Fig. S1–S4.
- 5) The GC peaks of each product were plotted with the moles that were obtained from the conversion of that gas volumes. Then, a calibration curve was made from the five spots on the plot, starting from the origin. The calibration curve of each standard gas is shown in Fig. S5–S14.

**Table S1.** Information on standard gases for making calibration curves

| Standard gas                       | Concentration (% v/v) | Volume for GC injection  |
|------------------------------------|-----------------------|--------------------------|
| CH <sub>4</sub>                    | 5.00                  | 0, 0.4, 0.5, 0.8, 1.0 mL |
| CO                                 | 5.01                  |                          |
| CO <sub>2</sub>                    | 4.99                  |                          |
| C <sub>2</sub> H <sub>4</sub>      | 4.97                  | 0, 0.2, 0.4, 0.6, 0.8 mL |
| C <sub>2</sub> H <sub>6</sub>      | 5.03                  |                          |
| C <sub>3</sub> H <sub>6</sub>      | 5.03                  |                          |
| C <sub>3</sub> H <sub>8</sub>      | 5.00                  |                          |
| n-C <sub>4</sub> H <sub>10</sub>   | 5.02                  |                          |
| iso-C <sub>4</sub> H <sub>10</sub> | 5.02                  |                          |
| H <sub>2</sub>                     | 99.999                | 0, 50, 100, 150, 200 μL  |

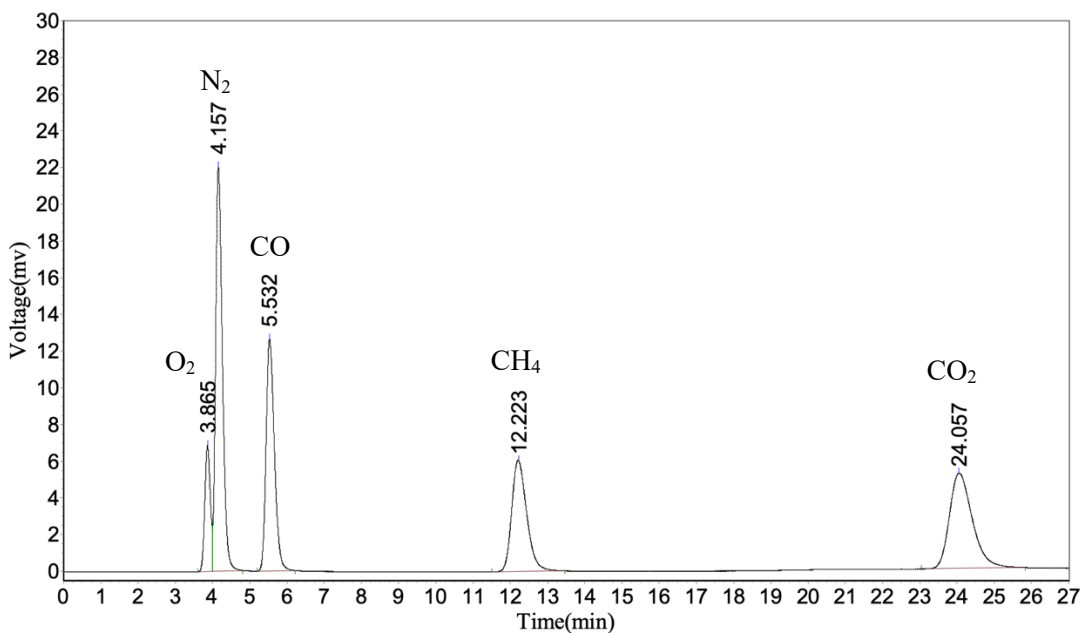

**Fig. S1.** GC peaks of standard gases. TCD signal with peaks of O<sub>2</sub>, N<sub>2</sub>, CO, CH<sub>4</sub>, and CO<sub>2</sub>.

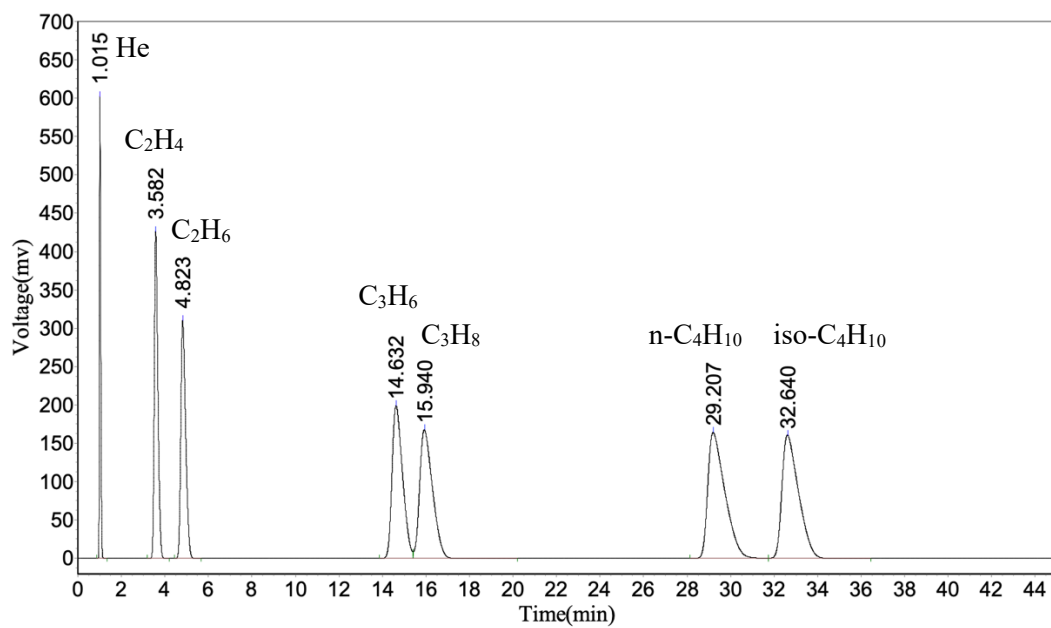

**Fig. S2.** GC peaks of standard gases. FID signal with peaks of He, C<sub>2</sub>H<sub>4</sub>, C<sub>2</sub>H<sub>6</sub>, C<sub>3</sub>H<sub>6</sub>, C<sub>3</sub>H<sub>8</sub>, n-C<sub>4</sub>H<sub>10</sub>, and iso-C<sub>4</sub>H<sub>10</sub>.

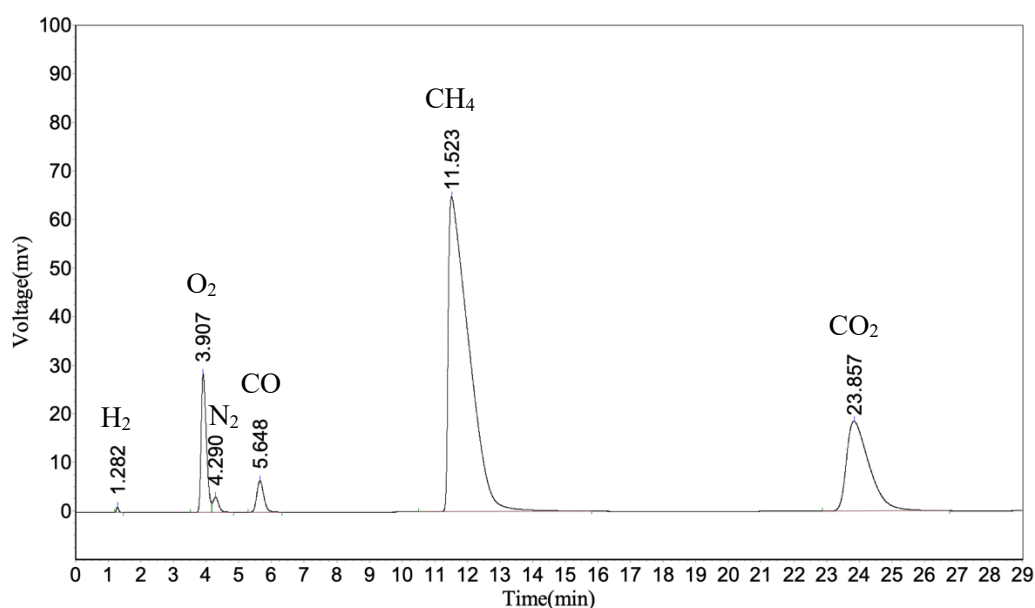

**Fig. S3.** Peaks of product gases with TCD signal, including H<sub>2</sub>, O<sub>2</sub>, N<sub>2</sub>, CO, CH<sub>4</sub>, and CO<sub>2</sub>. Reaction conditions of hybrid catalyst of 5Ni/Al<sub>2</sub>O<sub>3</sub> and 4.6K-20Co/Al<sub>2</sub>O<sub>3</sub> at atmospheric pressure, total flow rate = 40 mL/min, reactor temperature = 490 °C, CH<sub>4</sub>:O<sub>2</sub> = 2, and Ni:K-Co = 1.

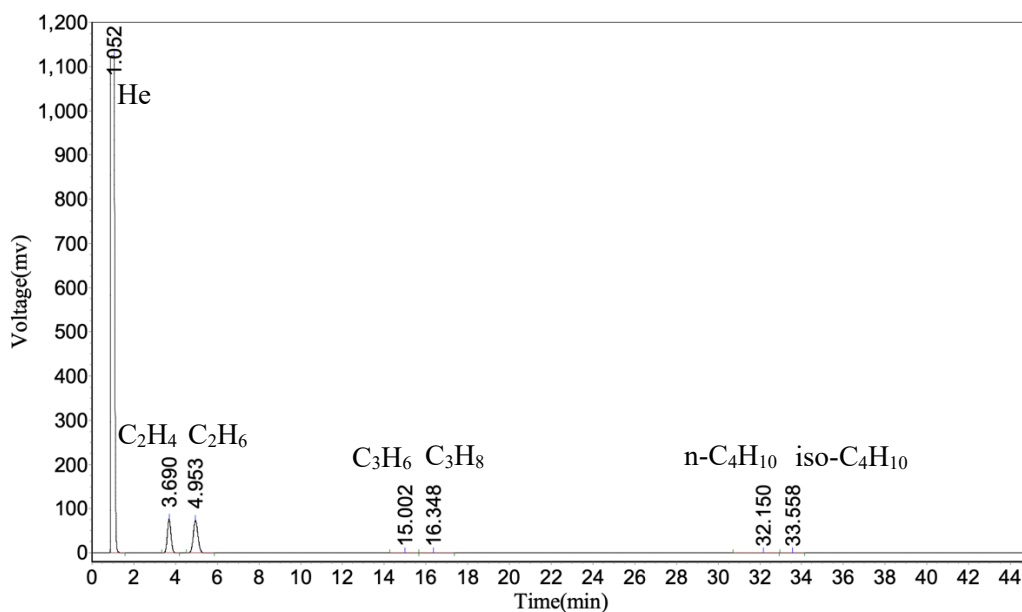

**Fig. S4.** Peaks of product gases with FID signal, including He, C<sub>2</sub>H<sub>4</sub>, C<sub>2</sub>H<sub>6</sub>, C<sub>3</sub>H<sub>6</sub>, C<sub>3</sub>H<sub>8</sub>, n-C<sub>4</sub>H<sub>10</sub>, and iso-C<sub>4</sub>H<sub>10</sub>. Reaction conditions of hybrid catalyst of 5Ni/Al<sub>2</sub>O<sub>3</sub> and 4.6K-20Co/Al<sub>2</sub>O<sub>3</sub> at atmospheric pressure, total flow rate = 40 mL/min, reactor temperature = 490 °C, CH<sub>4</sub>:O<sub>2</sub> = 2, and Ni:K-Co = 1.

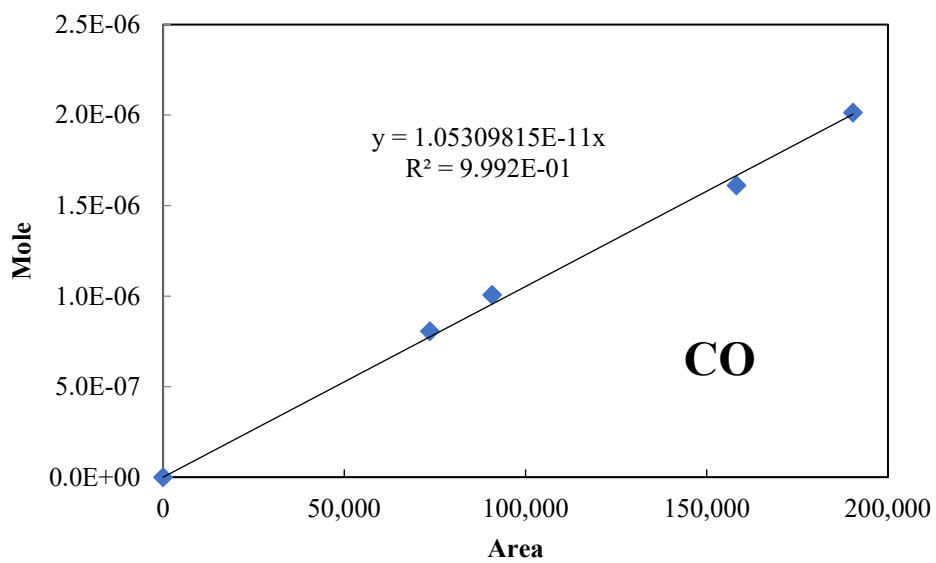

**Fig. S5.** Calibration curve of carbon monoxide (CO).

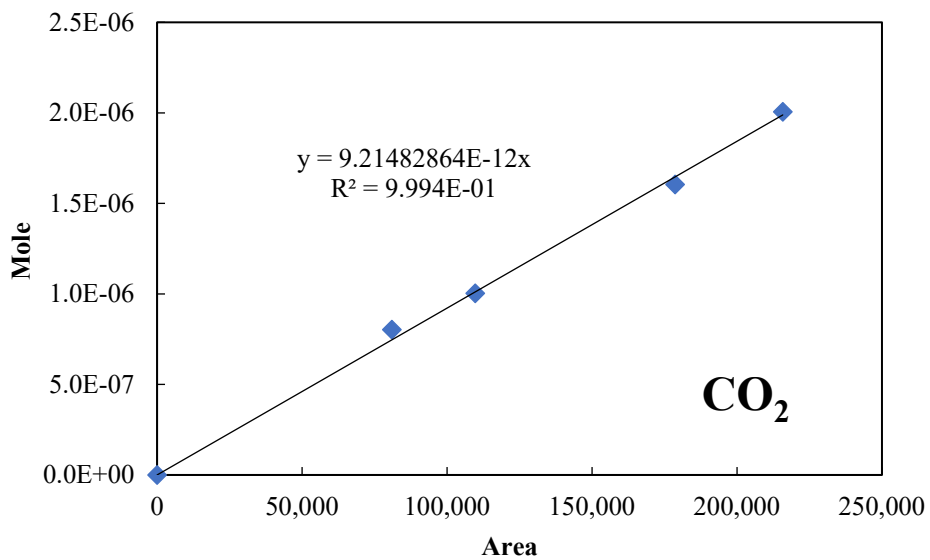

**Fig. S6.** Calibration curve of carbon dioxide (CO<sub>2</sub>).

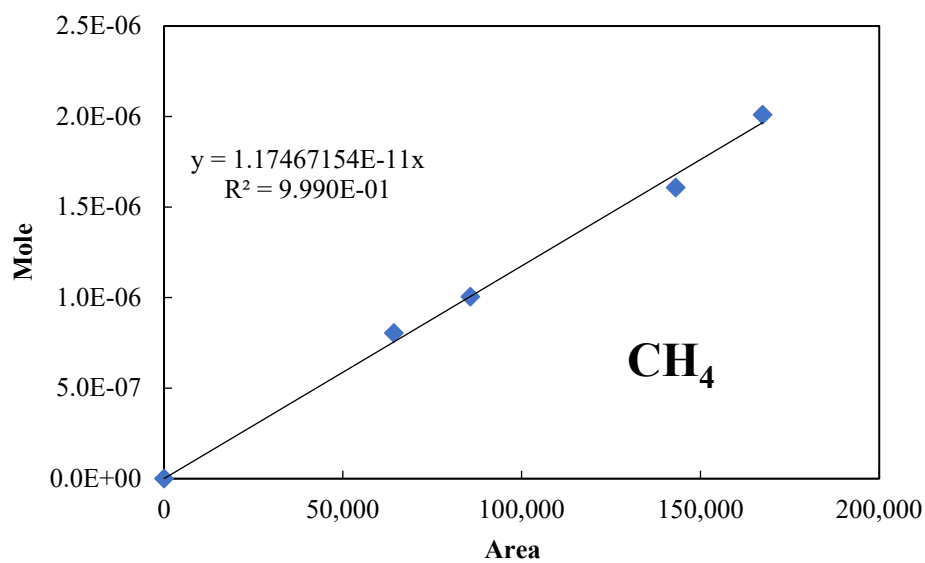

**Fig. S7.** Calibration curve of methane (CH<sub>4</sub>).

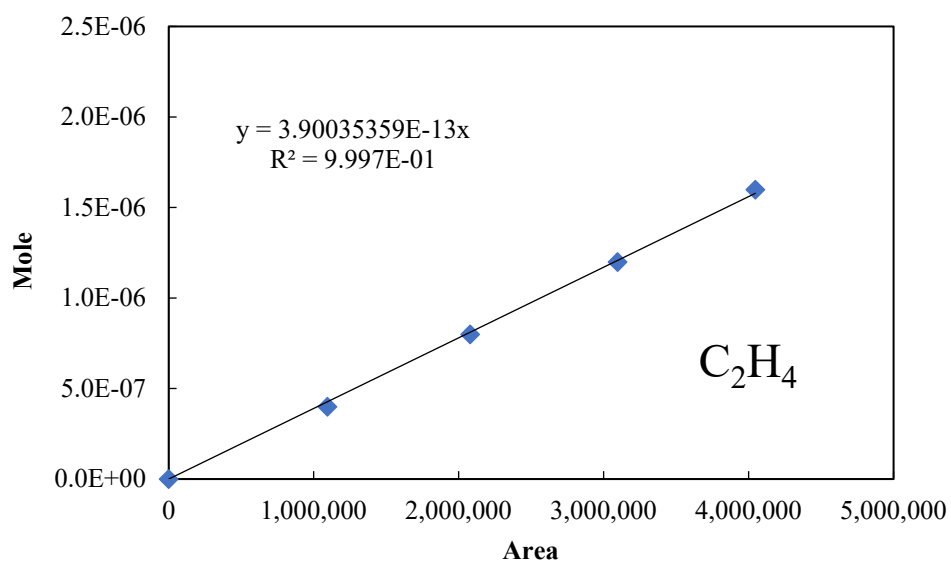

**Fig. S8.** Calibration curve of ethylene (C<sub>2</sub>H<sub>4</sub>).

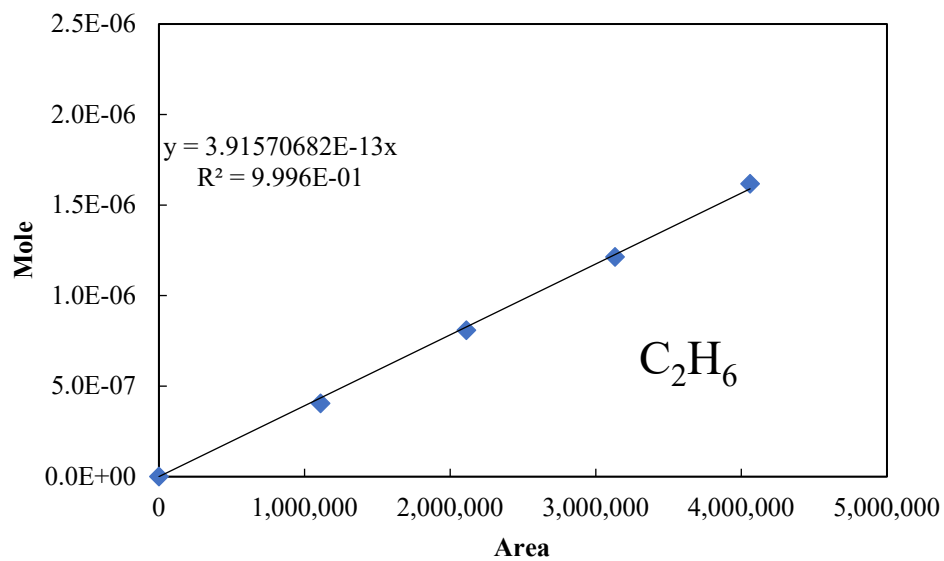

**Fig. S9.** Calibration curve of ethane ( $C_2H_6$ ).

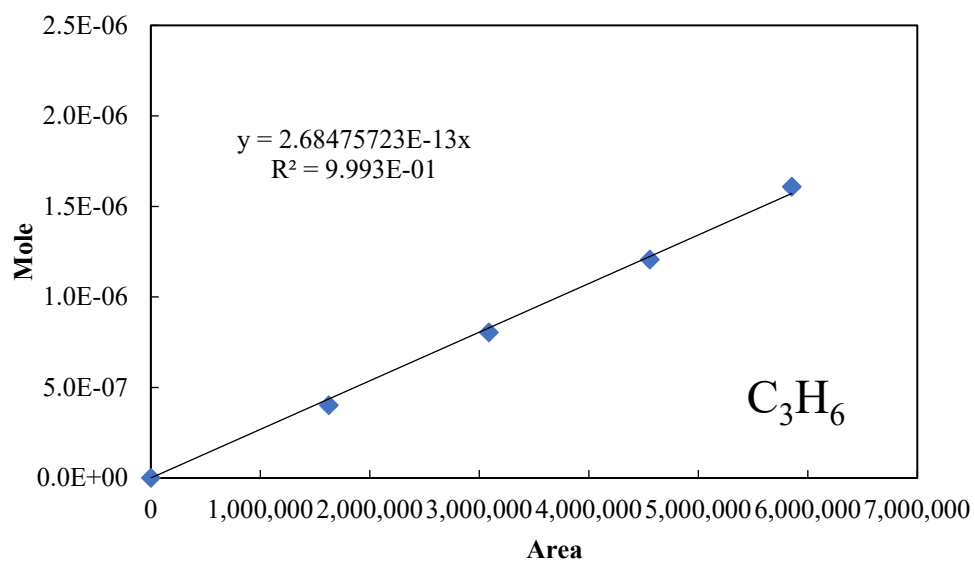

**Fig. S10.1** Calibration curve of propene ( $C_3H_6$ ).

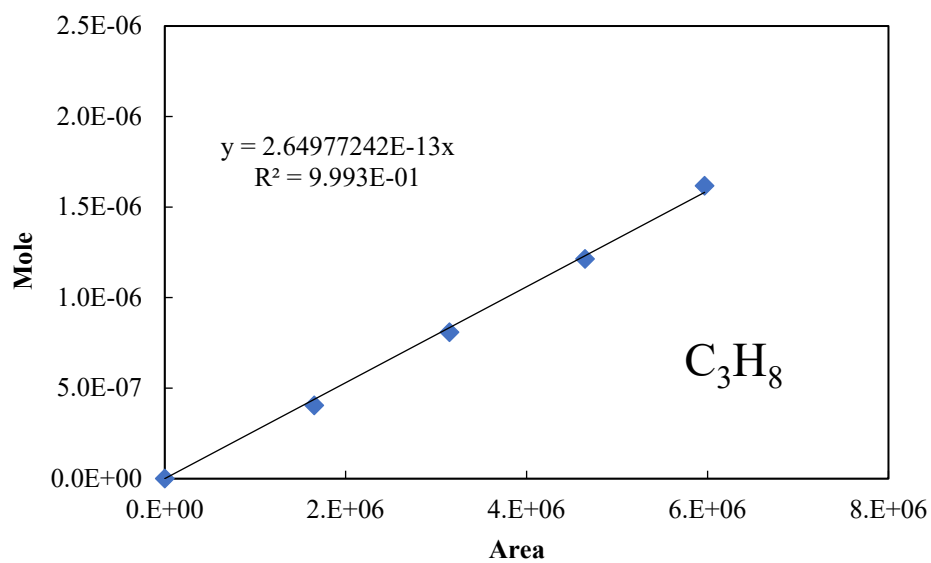

**Fig. S11.** Calibration curve of propane ( $C_3H_8$ ).

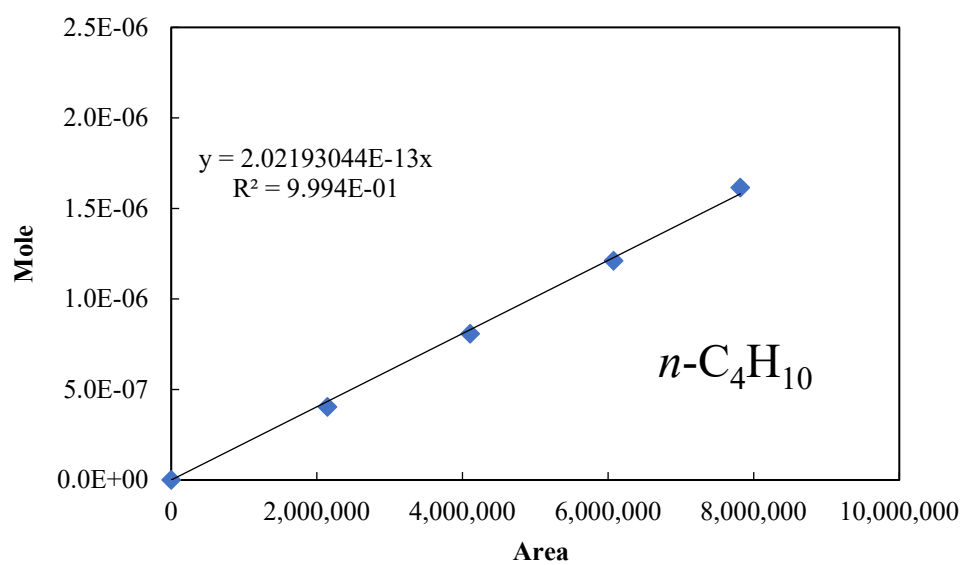

**Fig. S12.** Calibration curve of n-butane ( $n-C_4H_{10}$ ).



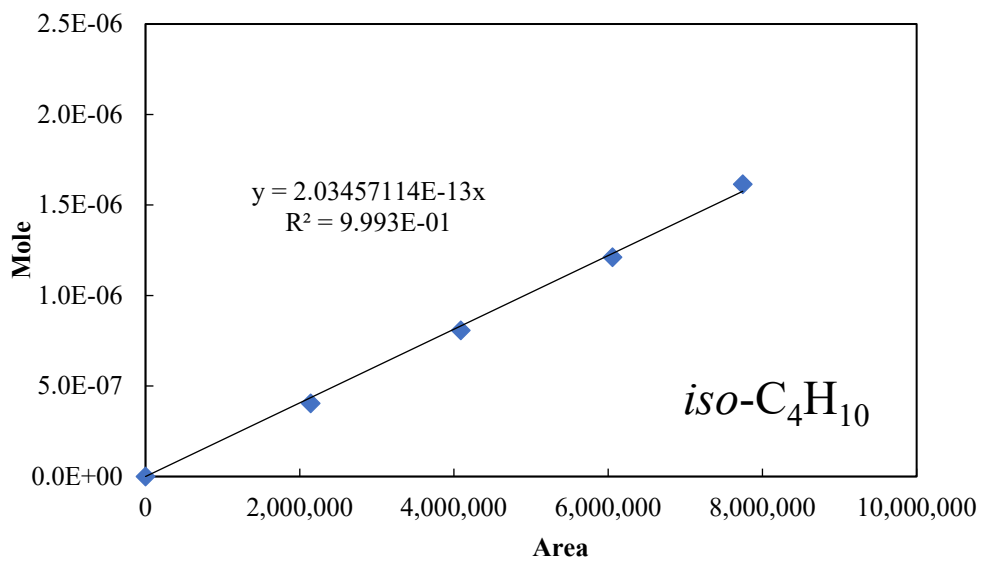

**Fig. S13.** Calibration curve of iso-butane ( $C_4H_{10}$ ).

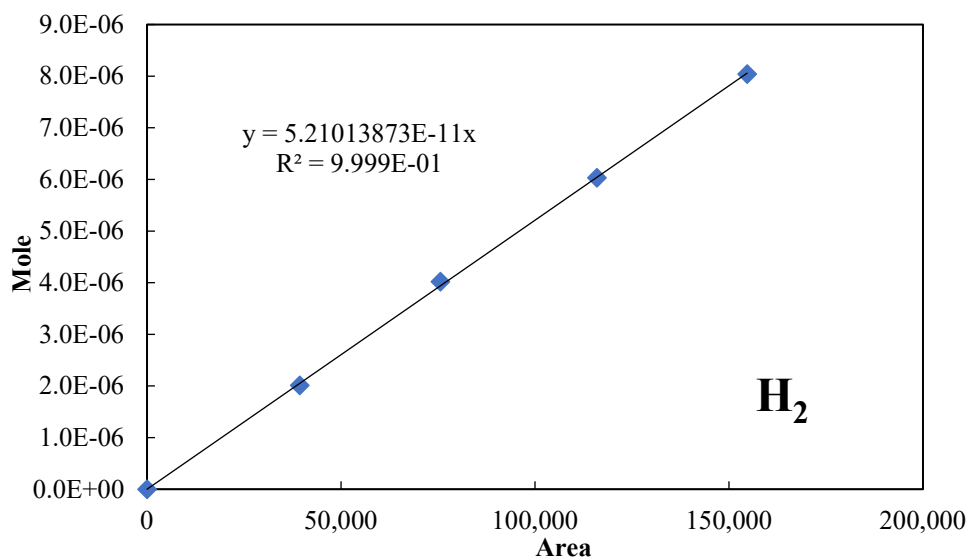

**Fig. S14.** Calibration curve of hydrogen ( $H_2$ ).

**Table S2** An example of the carbon balance for of hybrid catalyst of 5Ni/Al<sub>2</sub>O<sub>3</sub> and 4.6K-20Co/Al<sub>2</sub>O<sub>3</sub> that is shown in Fig. 13.

| Time (h) | Blank CH <sub>4</sub> or CH <sub>4,in</sub> (x10 <sup>-5</sup> ) (moles) | Gases out (moles)       |                                      |                                      |                                                    |                                                    |                                                    |                                                    |                                                        |                                                          | Gases out: Product in terms of CH <sub>4</sub> consumed (moles) |                                      |                                      |                                                      |                                                      |                                                      |                                                      |                                                         |                                                            | CH <sub>4,in</sub> (x10 <sup>-5</sup> ) (moles) | <sup>a</sup> Sum of Carbon <sub>out</sub> (x10 <sup>-5</sup> ) (moles) | <sup>b</sup> CH <sub>4</sub> balance error (%) |
|----------|--------------------------------------------------------------------------|-------------------------|--------------------------------------|--------------------------------------|----------------------------------------------------|----------------------------------------------------|----------------------------------------------------|----------------------------------------------------|--------------------------------------------------------|----------------------------------------------------------|-----------------------------------------------------------------|--------------------------------------|--------------------------------------|------------------------------------------------------|------------------------------------------------------|------------------------------------------------------|------------------------------------------------------|---------------------------------------------------------|------------------------------------------------------------|-------------------------------------------------|------------------------------------------------------------------------|------------------------------------------------|
|          |                                                                          | CO (x10 <sup>-7</sup> ) | CH <sub>4</sub> (x10 <sup>-5</sup> ) | CO <sub>2</sub> (x10 <sup>-6</sup> ) | C <sub>2</sub> H <sub>4</sub> (x10 <sup>-7</sup> ) | C <sub>2</sub> H <sub>6</sub> (x10 <sup>-7</sup> ) | C <sub>3</sub> H <sub>6</sub> (x10 <sup>-9</sup> ) | C <sub>3</sub> H <sub>8</sub> (x10 <sup>-9</sup> ) | n-C <sub>4</sub> H <sub>10</sub> (x10 <sup>-10</sup> ) | iso-C <sub>4</sub> H <sub>10</sub> (x10 <sup>-11</sup> ) | CO (x10 <sup>-7</sup> )                                         | CH <sub>4</sub> (x10 <sup>-5</sup> ) | CO <sub>2</sub> (x10 <sup>-6</sup> ) | 2*C <sub>2</sub> H <sub>4</sub> (x10 <sup>-7</sup> ) | 2*C <sub>2</sub> H <sub>6</sub> (x10 <sup>-6</sup> ) | 3*C <sub>3</sub> H <sub>6</sub> (x10 <sup>-8</sup> ) | 3*C <sub>3</sub> H <sub>8</sub> (x10 <sup>-8</sup> ) | 4*n-C <sub>4</sub> H <sub>10</sub> (x10 <sup>-9</sup> ) | 4*iso-C <sub>4</sub> H <sub>10</sub> (x10 <sup>-10</sup> ) |                                                 |                                                                        |                                                |
| 1        | 4.80                                                                     | 5.45                    | 3.54                                 | 9.99                                 | 3.70                                               | 5.48                                               | 3.73                                               | 7.09                                               | 4.61                                                   | 0.97                                                     | 5.45                                                            | 3.54                                 | 9.99                                 | 7.39                                                 | 1.10                                                 | 1.12                                                 | 2.13                                                 | 1.84                                                    | 3.90                                                       | 4.80                                            | 4.78                                                                   | 0.32                                           |
| 2        | 4.80                                                                     | 6.76                    | 3.58                                 | 9.74                                 | 3.63                                               | 5.29                                               | 3.88                                               | 6.78                                               | 0.00                                                   | 0.00                                                     | 6.76                                                            | 3.58                                 | 9.74                                 | 7.26                                                 | 1.06                                                 | 1.16                                                 | 2.04                                                 | 0.00                                                    | 0.00                                                       | 4.80                                            | 4.80                                                                   | -0.14                                          |
| 3        | 4.80                                                                     | 7.43                    | 3.59                                 | 9.48                                 | 3.67                                               | 5.25                                               | 4.44                                               | 7.27                                               | 5.85                                                   | 1.06                                                     | 7.43                                                            | 3.59                                 | 9.48                                 | 7.33                                                 | 1.05                                                 | 1.33                                                 | 2.18                                                 | 2.34                                                    | 4.24                                                       | 4.80                                            | 4.80                                                                   | 0.03                                           |
| 4        | 4.80                                                                     | 7.95                    | 3.56                                 | 9.49                                 | 3.80                                               | 5.25                                               | 4.43                                               | 7.06                                               | 0.00                                                   | 0.00                                                     | 7.95                                                            | 3.56                                 | 9.49                                 | 7.60                                                 | 1.05                                                 | 1.33                                                 | 2.12                                                 | 0.00                                                    | 0.00                                                       | 4.80                                            | 4.77                                                                   | 0.56                                           |
| 5        | 4.80                                                                     | 8.44                    | 3.56                                 | 9.39                                 | 3.84                                               | 5.23                                               | 4.98                                               | 7.48                                               | 6.71                                                   | 1.06                                                     | 8.44                                                            | 3.56                                 | 9.39                                 | 7.68                                                 | 1.05                                                 | 1.49                                                 | 2.24                                                 | 2.68                                                    | 4.25                                                       | 4.80                                            | 4.77                                                                   | 0.64                                           |
| 6        | 4.80                                                                     | 8.73                    | 3.57                                 | 9.33                                 | 3.91                                               | 5.20                                               | 5.09                                               | 7.49                                               | 6.80                                                   | 1.09                                                     | 8.73                                                            | 3.57                                 | 9.33                                 | 7.83                                                 | 1.04                                                 | 1.53                                                 | 2.25                                                 | 2.72                                                    | 4.35                                                       | 4.80                                            | 4.77                                                                   | 0.52                                           |
| 7        | 4.80                                                                     | 8.97                    | 3.56                                 | 9.17                                 | 3.88                                               | 5.13                                               | 5.13                                               | 7.46                                               | 0.00                                                   | 0.00                                                     | 8.97                                                            | 3.56                                 | 9.17                                 | 7.77                                                 | 1.03                                                 | 1.54                                                 | 2.24                                                 | 0.00                                                    | 0.00                                                       | 4.80                                            | 4.75                                                                   | 0.94                                           |
| 8        | 4.80                                                                     | 9.18                    | 3.57                                 | 9.11                                 | 3.91                                               | 5.10                                               | 7.59                                               | 7.51                                               | 7.07                                                   | 1.32                                                     | 9.18                                                            | 3.57                                 | 9.11                                 | 7.83                                                 | 1.02                                                 | 2.28                                                 | 2.25                                                 | 2.83                                                    | 5.29                                                       | 4.80                                            | 4.76                                                                   | 0.83                                           |
| 9        | 4.80                                                                     | 9.32                    | 3.57                                 | 9.01                                 | 3.90                                               | 5.03                                               | 5.23                                               | 7.37                                               | 7.41                                                   | 1.46                                                     | 9.32                                                            | 3.57                                 | 9.01                                 | 7.80                                                 | 1.01                                                 | 1.57                                                 | 2.21                                                 | 2.97                                                    | 5.84                                                       | 4.80                                            | 4.75                                                                   | 1.04                                           |
| 10       | 4.80                                                                     | 9.56                    | 3.56                                 | 8.88                                 | 3.86                                               | 4.95                                               | 5.27                                               | 7.39                                               | 7.13                                                   | 1.31                                                     | 9.56                                                            | 3.56                                 | 8.88                                 | 7.73                                                 | 0.99                                                 | 1.58                                                 | 2.22                                                 | 2.85                                                    | 5.23                                                       | 4.80                                            | 4.73                                                                   | 1.45                                           |
| 11       | 4.80                                                                     | 9.73                    | 3.57                                 | 8.82                                 | 3.84                                               | 4.88                                               | 5.24                                               | 7.30                                               | 0.00                                                   | 0.00                                                     | 9.73                                                            | 3.57                                 | 8.82                                 | 7.67                                                 | 0.98                                                 | 1.57                                                 | 2.19                                                 | 0.00                                                    | 0.00                                                       | 4.80                                            | 4.73                                                                   | 1.36                                           |
| 12       | 4.80                                                                     | 9.94                    | 3.58                                 | 8.79                                 | 3.84                                               | 4.84                                               | 5.24                                               | 7.25                                               | 7.36                                                   | 1.27                                                     | 9.94                                                            | 3.58                                 | 8.79                                 | 7.68                                                 | 0.97                                                 | 1.57                                                 | 2.17                                                 | 2.95                                                    | 5.07                                                       | 4.80                                            | 4.74                                                                   | 1.27                                           |
| 13       | 4.80                                                                     | 10.14                   | 3.58                                 | 8.69                                 | 3.83                                               | 4.79                                               | 5.31                                               | 7.25                                               | 7.84                                                   | 1.55                                                     | 10.14                                                           | 3.58                                 | 8.69                                 | 7.66                                                 | 0.96                                                 | 1.59                                                 | 2.17                                                 | 3.14                                                    | 6.19                                                       | 4.80                                            | 4.72                                                                   | 1.54                                           |
| 14       | 4.80                                                                     | 10.33                   | 3.58                                 | 8.76                                 | 3.85                                               | 4.77                                               | 5.53                                               | 7.31                                               | 2.59                                                   | 1.61                                                     | 10.33                                                           | 3.58                                 | 8.76                                 | 7.71                                                 | 0.95                                                 | 1.66                                                 | 2.19                                                 | 1.03                                                    | 6.46                                                       | 4.80                                            | 4.73                                                                   | 1.33                                           |
| 15       | 4.80                                                                     | 10.45                   | 3.62                                 | 8.62                                 | 3.71                                               | 4.63                                               | 5.16                                               | 7.06                                               | 0.00                                                   | 0.00                                                     | 10.45                                                           | 3.62                                 | 8.62                                 | 7.42                                                 | 0.93                                                 | 1.55                                                 | 2.12                                                 | 0.00                                                    | 0.00                                                       | 4.80                                            | 4.75                                                                   | 0.94                                           |
| 16       | 4.80                                                                     | 10.55                   | 3.61                                 | 8.51                                 | 3.61                                               | 4.52                                               | 5.06                                               | 6.90                                               | 7.02                                                   | 1.16                                                     | 10.55                                                           | 3.61                                 | 8.51                                 | 7.21                                                 | 0.90                                                 | 1.52                                                 | 2.07                                                 | 2.81                                                    | 4.64                                                       | 4.80                                            | 4.74                                                                   | 1.26                                           |
| 17       | 4.80                                                                     | 10.62                   | 3.61                                 | 8.50                                 | 3.59                                               | 4.49                                               | 5.05                                               | 6.83                                               | 0.00                                                   | 0.00                                                     | 10.62                                                           | 3.61                                 | 8.50                                 | 7.18                                                 | 0.90                                                 | 1.52                                                 | 2.05                                                 | 0.00                                                    | 0.00                                                       | 4.80                                            | 4.73                                                                   | 1.34                                           |
| 18       | 4.80                                                                     | 10.75                   | 3.59                                 | 8.42                                 | 3.52                                               | 4.41                                               | 4.93                                               | 6.72                                               | 7.07                                                   | 1.03                                                     | 10.75                                                           | 3.59                                 | 8.42                                 | 7.04                                                 | 0.88                                                 | 1.48                                                 | 2.01                                                 | 2.83                                                    | 4.13                                                       | 4.80                                            | 4.70                                                                   | 2.00                                           |
| 19       | 4.80                                                                     | 10.86                   | 3.62                                 | 8.35                                 | 3.52                                               | 4.38                                               | 4.98                                               | 6.76                                               | 7.02                                                   | 1.22                                                     | 10.86                                                           | 3.62                                 | 8.35                                 | 7.04                                                 | 0.88                                                 | 1.49                                                 | 2.03                                                 | 2.81                                                    | 4.86                                                       | 4.80                                            | 4.72                                                                   | 1.59                                           |
| 20       | 4.80                                                                     | 10.97                   | 3.59                                 | 8.29                                 | 3.50                                               | 4.34                                               | 4.96                                               | 6.67                                               | 7.10                                                   | 1.29                                                     | 10.97                                                           | 3.59                                 | 8.29                                 | 6.99                                                 | 0.87                                                 | 1.49                                                 | 2.00                                                 | 2.84                                                    | 5.15                                                       | 4.80                                            | 4.69                                                                   | 2.22                                           |
| 21       | 4.80                                                                     | 11.08                   | 3.57                                 | 8.22                                 | 3.49                                               | 4.31                                               | 4.91                                               | 6.61                                               | 7.14                                                   | 1.24                                                     | 11.08                                                           | 3.57                                 | 8.22                                 | 6.98                                                 | 0.86                                                 | 1.47                                                 | 1.98                                                 | 2.86                                                    | 4.95                                                       | 4.80                                            | 4.66                                                                   | 2.85                                           |
| 22       | 4.80                                                                     | 11.12                   | 3.55                                 | 8.04                                 | 3.44                                               | 4.23                                               | 4.83                                               | 6.46                                               | 7.22                                                   | 1.20                                                     | 11.12                                                           | 3.55                                 | 8.04                                 | 6.88                                                 | 0.85                                                 | 1.45                                                 | 1.94                                                 | 2.89                                                    | 4.78                                                       | 4.80                                            | 4.63                                                                   | 3.56                                           |
| 23       | 4.80                                                                     | 11.23                   | 3.55                                 | 8.19                                 | 3.61                                               | 4.35                                               | 5.18                                               | 6.72                                               | 7.98                                                   | 1.43                                                     | 11.23                                                           | 3.55                                 | 8.19                                 | 7.23                                                 | 0.87                                                 | 1.55                                                 | 2.02                                                 | 3.19                                                    | 5.72                                                       | 4.80                                            | 4.64                                                                   | 3.27                                           |
| 24       | 4.80                                                                     | 11.53                   | 3.58                                 | 8.46                                 | 3.87                                               | 4.53                                               | 5.65                                               | 7.03                                               | 8.92                                                   | 1.45                                                     | 11.53                                                           | 3.58                                 | 8.46                                 | 7.74                                                 | 0.91                                                 | 1.69                                                 | 2.11                                                 | 3.57                                                    | 5.79                                                       | 4.80                                            | 4.71                                                                   | 1.77                                           |

<sup>a</sup>Sum of carbon<sub>out</sub> = 2(n<sub>C<sub>2</sub>H<sub>4</sub></sub> + n<sub>C<sub>2</sub>H<sub>6</sub></sub>) + 3(n<sub>C<sub>3</sub>H<sub>6</sub></sub> + n<sub>C<sub>3</sub>H<sub>8</sub></sub>) + 4(n<sub>C<sub>4</sub>H<sub>10</sub></sub>) + n<sub>CO</sub> + n<sub>CO<sub>2</sub></sub> + n<sub>CH<sub>4</sub>,out</sub>

<sup>b</sup>CH<sub>4</sub> balance error (%) = [n<sub>CH<sub>4</sub>,in</sub> - (Sum of carbon<sub>out</sub>)] × 100/ n<sub>CH<sub>4</sub>,in</sub> ; where n = number of moles

**Table S3** Crystalline XRD values ( $2\theta$ ) observed in different catalysts.

| Catalyst                                       | Crystalline phase                        | $2\theta$ (degree)                                                   | ICDD No.    |
|------------------------------------------------|------------------------------------------|----------------------------------------------------------------------|-------------|
| 5Ni/Al <sub>2</sub> O <sub>3</sub>             | NiO                                      | 37.18, 43.18, 62.84, 75.56                                           | 00-047-1049 |
|                                                | $\gamma$ -Al <sub>2</sub> O <sub>3</sub> | 19.42, 32.73, 37.18, 39.37, 45.57, 60.60, 66.85                      | 01-077-0396 |
| 20Co/Al <sub>2</sub> O <sub>3</sub>            | Guite (Co <sub>3</sub> O <sub>4</sub> )  | 18.98, 31.25, 36.86, 38.51, 44.80, 55.62, 59.41, 65.30, 77.50, 78.40 | 00-043-1003 |
|                                                | $\gamma$ -Al <sub>2</sub> O <sub>3</sub> | 19.42, 32.73, 37.18, 39.37, 45.57, 60.60, 66.85                      | 01-077-0396 |
| 4.6K-20Co/Al <sub>2</sub> O <sub>3</sub>       | Guite (Co <sub>3</sub> O <sub>4</sub> )  | 18.97, 31.25, 36.84, 38.57, 44.80, 55.65, 59.35, 65.29, 77.51, 78.55 | 00-043-1003 |
|                                                | Niter (KNO <sub>3</sub> )                | 23.51, 23.76, 29.39, 32.30, 33.78, 41.13, 41.72, 46.47, 64.76        | 01-071-1558 |
|                                                | $\gamma$ -Al <sub>2</sub> O <sub>3</sub> | 19.42, 32.73, 37.18, 39.37, 45.57, 60.60, 66.85                      | 01-077-0396 |
| Spent 5Ni/Al <sub>2</sub> O <sub>3</sub>       | NiO                                      | 37.14, 43.18, 62.80, 75.36                                           | 00-047-1049 |
|                                                | $\gamma$ -Al <sub>2</sub> O <sub>3</sub> | 19.42, 32.73, 37.18, 39.37, 45.57, 60.60, 66.85                      | 01-077-0396 |
| Spent 4.6K-20Co/Al <sub>2</sub> O <sub>3</sub> | Guite (Co <sub>3</sub> O <sub>4</sub> )  | 18.96, 31.22, 36.80, 38.52, 44.80, 55.60, 59.31, 65.20, 77.37, 77.98 | 00-043-1003 |
|                                                | Niter (KNO <sub>3</sub> )                | 23.51, 23.76, 29.39, 32.30, 33.78, 41.13, 41.72, 46.47, 64.76        | 01-071-1558 |
|                                                | $\gamma$ -Al <sub>2</sub> O <sub>3</sub> | 19.42, 32.73, 37.18, 39.37, 45.57, 60.60, 66.85                      | 01-077-0396 |

**Table S4** EDX analysis of each prepared catalyst.

| Catalyst                                         | EDX and weight percent elemental                                                  |                                                                                     |                                                                                       |                                                                                       |                                                                                       |
|--------------------------------------------------|-----------------------------------------------------------------------------------|-------------------------------------------------------------------------------------|---------------------------------------------------------------------------------------|---------------------------------------------------------------------------------------|---------------------------------------------------------------------------------------|
|                                                  | Ni                                                                                | O                                                                                   | Al                                                                                    | Co                                                                                    | K                                                                                     |
| 5Ni/<br>Al <sub>2</sub> O <sub>3</sub>           | 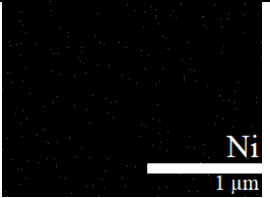 |    |    |                                                                                       |                                                                                       |
| 20Co/<br>Al <sub>2</sub> O <sub>3</sub>          |                                                                                   |    |    |    |                                                                                       |
| 4.6K-<br>20Co/<br>Al <sub>2</sub> O <sub>3</sub> |                                                                                   |  |  |  |  |

**Table S5** A review of the OCM catalysts reported in the literature.

| Catalyst                                                                                    | Reaction temperature (°C) | C <sub>2+</sub> yield (%) | C <sub>2+</sub> selectivity (%) | CH <sub>4</sub> conversion (%) | Ref.      |
|---------------------------------------------------------------------------------------------|---------------------------|---------------------------|---------------------------------|--------------------------------|-----------|
| Ni/Al <sub>2</sub> O <sub>3</sub> and K-Co/Al <sub>2</sub> O <sub>3</sub> (Hybrid catalyst) | 490                       | 4.30                      | 15.80                           | 27.19                          | This work |
| Na <sub>2</sub> WO <sub>4</sub> /SiO <sub>2</sub>                                           | 800                       | 9.1                       | 74.3                            | 12.3                           | [1]       |
| Mn-Na <sub>2</sub> WO <sub>4</sub> /SiO <sub>2</sub>                                        | 800                       | 23.9                      | 64.9                            | 36.8                           | [1]       |
| Mn/Na <sub>2</sub> WO <sub>4</sub> /SiO <sub>2</sub>                                        | 850                       | 26.4                      | 80.0                            | 33.0                           | [2]       |
| Na <sub>2</sub> WO <sub>4</sub> /SiO <sub>2</sub>                                           | 850                       | 22.9                      | 52.0                            | 44.0                           | [2]       |
| Na <sub>2</sub> WO <sub>4</sub> /SiO <sub>2</sub>                                           | 775                       | 7.0                       | 63.0                            | 11.0                           | [3]       |
| V/Na <sub>2</sub> WO <sub>4</sub> /SiO <sub>2</sub>                                         | 775                       | 1.2                       | 12.0                            | 10.0                           | [3]       |
| Cr/Na <sub>2</sub> WO <sub>4</sub> /SiO <sub>2</sub>                                        | 775                       | 2.4                       | 24.0                            | 10.0                           | [3]       |
| Mn/Na <sub>2</sub> WO <sub>4</sub> /SiO <sub>2</sub>                                        | 775                       | 16.0                      | 80.0                            | 20.0                           | [3]       |
| Fe/Na <sub>2</sub> WO <sub>4</sub> /SiO <sub>2</sub>                                        | 775                       | 9.0                       | 60.0                            | 15.0                           | [3]       |
| CO/Na <sub>2</sub> WO <sub>4</sub> /SiO <sub>2</sub>                                        | 775                       | 11.0                      | 68.0                            | 16.0                           | [3]       |
| Zn/Na <sub>2</sub> WO <sub>4</sub> /SiO <sub>2</sub>                                        | 775                       | 6.0                       | 63.0                            | 9.0                            | [3]       |
| Mn-Na <sub>2</sub> WO <sub>4</sub> /SiO <sub>2</sub>                                        | 850                       | 17.0                      | 75.0                            | 22.0                           | [4]       |
| Na <sub>2</sub> WO <sub>4</sub> /Mn/SiO <sub>2</sub>                                        | 850                       | 17.2                      | 54.0                            | 32.0                           | [5]       |
| W-Mn/SiO <sub>2</sub>                                                                       | 820                       | 20.7                      | 68.4                            | 30.3                           | [6]       |
| W-Li/SiO <sub>2</sub>                                                                       | 800                       | 6.0                       | 52.0                            | 10.0                           | [7]       |
| Mn-Li/SiO <sub>2</sub>                                                                      | 800                       | 6.0                       | 40.0                            | 15.0                           | [7]       |
| Mn-W/SiO <sub>2</sub>                                                                       | 800                       | 6.0                       | 40.0                            | 15.0                           | [7]       |
| Mn-0.1Li-W/SiO <sub>2</sub>                                                                 | 800                       | 11.0                      | 58.0                            | 18.0                           | [7]       |
| Mn-0.25Li-W/SiO <sub>2</sub>                                                                | 800                       | 15.0                      | 78.0                            | 18.0                           | [7]       |
| W-Li-W/SiO <sub>2</sub>                                                                     | 800                       | 15.0                      | 79.0                            | 19.0                           | [7]       |
| Na <sub>2</sub> WO <sub>4</sub> /Mn/SiO <sub>2</sub>                                        | 800                       | 11.2                      | 27.4                            | 41.0                           | [8]       |
| La/Na <sub>2</sub> WO <sub>4</sub> /Mn/SiO <sub>2</sub>                                     | 800                       | 10.6                      | 25.4                            | 41.7                           | [8]       |
| Na-W-Mn/SiO <sub>2</sub>                                                                    | 850                       | 29.0                      | 69.0                            | 42.0                           | [9]       |
| Na <sub>2</sub> WO <sub>4</sub> /SiO <sub>2</sub>                                           | 800                       | 15.0                      | 74.0                            | 20.0                           | [10]      |
| W/SiO <sub>2</sub>                                                                          | 800                       | 6.0                       | 54.0                            | 11.0                           | [10]      |
| Mn/SiO <sub>2</sub>                                                                         | 800                       | 9.0                       | 43.0                            | 19.0                           | [10]      |
| W-Na-Mn/SiO <sub>2</sub>                                                                    | 775                       | 18.3                      | 39.6                            | 46.1                           | [11]      |
| Mo-Na-Mn/SiO <sub>2</sub>                                                                   | 775                       | 12.5                      | 37.2                            | 33.6                           | [11]      |
| Nb-Na-Mn/SiO <sub>2</sub>                                                                   | 775                       | 13.0                      | 33.2                            | 39.3                           | [11]      |
| V-Na-Mn/SiO <sub>2</sub>                                                                    | 775                       | 2.7                       | 8.0                             | 33.5                           | [11]      |
| Cr-Na-Mn/SiO <sub>2</sub>                                                                   | 775                       | 4.6                       | 11.5                            | 40.1                           | [11]      |
| Ce-Mn/Na <sub>2</sub> WO <sub>4</sub> /SiO <sub>2</sub>                                     | 840                       | 21.1                      | 62.4                            | 33.9                           | [12]      |
| Na-W-Mn/SiO <sub>2</sub>                                                                    | 800                       | 19.1                      | 63.2                            | 30.2                           | [13]      |
| Mn-Na <sub>2</sub> WO <sub>4</sub> /SiO <sub>2</sub>                                        | 825                       | 19.1                      | 72.2                            | 26.5                           | [14]      |
| Mn/SiO <sub>2</sub>                                                                         | 800                       | 0.6                       | 14.4                            | 5.7                            | [15]      |
| Na <sub>2</sub> WO <sub>4</sub> /SiO <sub>2</sub>                                           | 800                       | 2.9                       | 69.0                            | 4.8                            | [15]      |
| Mn-Na <sub>2</sub> WO <sub>4</sub> /SiO <sub>2</sub>                                        | 800                       | 18.5                      | 73.3                            | 28.5                           | [15]      |
| NaCl-Mn-Na <sub>2</sub> WO <sub>4</sub> /SiO <sub>2</sub>                                   | 750                       | 34.6                      | 62.9                            | 55.0                           | [16]      |

**Table S5** A review of the OCM catalysts reported in the literature. (continued)

| Catalyst                                                                                            | Reaction temperature (°C) | C <sub>2+</sub> yield (%) | C <sub>2+</sub> selectivity (%) | CH <sub>4</sub> conversion (%) | Ref. |
|-----------------------------------------------------------------------------------------------------|---------------------------|---------------------------|---------------------------------|--------------------------------|------|
| KCl-Mn-Na <sub>2</sub> WO <sub>4</sub> /SiO <sub>2</sub>                                            | 750                       | 27.0                      | 75.3                            | 35.9                           | [16] |
| CsCl-Mn-Na <sub>2</sub> WO <sub>4</sub> /SiO <sub>2</sub>                                           | 750                       | 22.6                      | 74.9                            | 30.1                           | [16] |
| LiCl-Mn-Na <sub>2</sub> WO <sub>4</sub> /SiO <sub>2</sub>                                           | 750                       | 11.3                      | 80.2                            | 14.1                           | [16] |
| Mn-Na <sub>2</sub> WO <sub>4</sub> /SiO <sub>2</sub>                                                | 750                       | 5.2                       | 63.4                            | 8.2                            | [16] |
| Mn <sub>x</sub> O <sub>y</sub> -Na <sub>2</sub> WO <sub>4</sub> /D11-10                             | 750                       | 3.6                       | 52.9                            | 6.7                            | [17] |
| Mn <sub>x</sub> O <sub>y</sub> -Na <sub>2</sub> WO <sub>4</sub> /SiO <sub>2</sub> (grade 923)       | 750                       | 1.3                       | 63.6                            | 2.0                            | [17] |
| Mn <sub>x</sub> O <sub>y</sub> -Na <sub>2</sub> WO <sub>4</sub> /SiO <sub>2</sub> (fumed)           | 750                       | 4.5                       | 61.3                            | 7.4                            | [17] |
| Mn <sub>x</sub> O <sub>y</sub> -Na <sub>2</sub> WO <sub>4</sub> /Aerosil TT 600                     | 750                       | 4.5                       | 60.7                            | 7.3                            | [17] |
| Mn <sub>x</sub> O <sub>y</sub> -Na <sub>2</sub> WO <sub>4</sub> /Aeroperl R 806/30                  | 750                       | 4.9                       | 68.9                            | 7.1                            | [17] |
| Mn <sub>x</sub> O <sub>y</sub> -Na <sub>2</sub> WO <sub>4</sub> /Aerosil OX 50                      | 750                       | 3.5                       | 55.4                            | 6.4                            | [17] |
| Mn <sub>x</sub> O <sub>y</sub> -Na <sub>2</sub> WO <sub>4</sub> /Aerosil 380                        | 750                       | 4.2                       | 62.6                            | 6.6                            | [17] |
| Mn <sub>x</sub> O <sub>y</sub> -Na <sub>2</sub> WO <sub>4</sub> /Aerosil 300                        | 750                       | 3.3                       | 57.4                            | 5.9                            | [17] |
| Mn <sub>x</sub> O <sub>y</sub> -Na <sub>2</sub> WO <sub>4</sub> /Sipernat D10                       | 750                       | 3.5                       | 80.3                            | 4.4                            | [17] |
| Mn <sub>x</sub> O <sub>y</sub> -Na <sub>2</sub> WO <sub>4</sub> /Sipernat 310                       | 750                       | 5.4                       | 75.8                            | 7.0                            | [17] |
| Mn <sub>x</sub> O <sub>y</sub> -Na <sub>2</sub> WO <sub>4</sub> /SBA-15                             | 750                       | 10.4                      | 73.4                            | 14.1                           | [17] |
| Na <sub>2</sub> WO <sub>4</sub> /Mn/SiO <sub>2</sub>                                                | 800                       | 2.5                       | 67.6                            | 3.2                            | [18] |
| Na <sub>2</sub> WO <sub>4</sub> -Mn/SiO <sub>2</sub>                                                | 800                       | 19.6                      | 66.4                            | 29.5                           | [18] |
| TiO <sub>2</sub> -Mn <sub>2</sub> O <sub>3</sub> -Na <sub>2</sub> WO <sub>4</sub> /SiO <sub>2</sub> | 700                       | 14.0                      | 70.0                            | 20.0                           | [19] |
| TiO <sub>2</sub> -Mn <sub>2</sub> O <sub>3</sub> -Na <sub>2</sub> WO <sub>4</sub> /SiO <sub>2</sub> | 720                       | 19.7                      | 76.0                            | 26.0                           | [20] |
| Mn <sub>2</sub> O <sub>3</sub> -TiO <sub>2</sub> -Na <sub>2</sub> WO <sub>4</sub> /SiO <sub>2</sub> | 650                       | 13.6                      | 62.0                            | 22.0                           | [20] |
| Na <sub>2</sub> WO <sub>4</sub> /Mn/SiO <sub>2</sub> (silica gel)                                   | 775                       | 16.9                      | 50.8                            | 33.4                           | [21] |
| Na <sub>2</sub> WO <sub>4</sub> /Mn/SiO <sub>2</sub> (silica gel)                                   | 800                       | 17.1                      | 51.0                            | 33.5                           | [21] |
| Na <sub>2</sub> WO <sub>4</sub> /Mn/SiO <sub>2</sub> (fumed silica)                                 | 800                       | 16.5                      | 52.7                            | 33.3                           | [21] |
| Mn/Na <sub>2</sub> WO <sub>4</sub> /SiO <sub>2</sub>                                                | 725                       | 16.0                      | 79.8                            | 20.2                           | [22] |
| Mn-Na-W/SiO <sub>2</sub>                                                                            | 750                       | 16.0                      | 64.0                            | 25.0                           | [23] |
| Al-Na <sub>2</sub> WO <sub>4</sub> /SiO <sub>2</sub>                                                | 800                       | 3.2                       | 37.0                            | 7.69                           | [24] |
| Li-Na <sub>2</sub> WO <sub>4</sub> /SiO <sub>2</sub>                                                | 800                       | 4.6                       | 47.8                            | 9.56                           | [24] |
| La-Na <sub>2</sub> WO <sub>4</sub> /SiO <sub>2</sub>                                                | 800                       | 6.1                       | 49.5                            | 11.9                           | [24] |
| Cu-Na <sub>2</sub> WO <sub>4</sub> /SiO <sub>2</sub>                                                | 800                       | 7.5                       | 22.3                            | 33.8                           | [24] |
| Cr-Na <sub>2</sub> WO <sub>4</sub> /SiO <sub>2</sub>                                                | 800                       | 9.8                       | 29.9                            | 27.7                           | [24] |
| Na <sub>2</sub> -WO <sub>4</sub> /SiO <sub>2</sub>                                                  | 800                       | 10.9                      | 24.0                            | 33.5                           | [24] |
| Mg-Na <sub>2</sub> WO <sub>4</sub> /SiO <sub>2</sub>                                                | 800                       | 12.5                      | 53.2                            | 21.6                           | [24] |
| Ni-Na <sub>2</sub> WO <sub>4</sub> /SiO <sub>2</sub>                                                | 800                       | 13.7                      | 36.1                            | 35.4                           | [24] |
| Ce-Na <sub>2</sub> WO <sub>4</sub> /SiO <sub>2</sub>                                                | 800                       | 15.4                      | 32.9                            | 42.1                           | [24] |
| Zn-Na <sub>2</sub> WO <sub>4</sub> /SiO <sub>2</sub>                                                | 800                       | 17.8                      | 65.9                            | 25.5                           | [24] |
| Co-Na <sub>2</sub> WO <sub>4</sub> /SiO <sub>2</sub>                                                | 800                       | 18.4                      | 10.2                            | 41.8                           | [24] |

**Table S5** A review of the OCM catalysts reported in the literature. (continued)

| Catalyst              | Reaction temperature (°C) | C <sub>2+</sub> yield (%) | C <sub>2+</sub> selectivity (%) | CH <sub>4</sub> conversion (%) | Ref. |
|-----------------------|---------------------------|---------------------------|---------------------------------|--------------------------------|------|
| Mn-W/SiO <sub>2</sub> | 800                       | 11.0                      | 48.0                            | 24.0                           | [24] |

|                                                                                                           |     |       |      |      |      |
|-----------------------------------------------------------------------------------------------------------|-----|-------|------|------|------|
| Ce-W/SiO <sub>2</sub>                                                                                     | 800 | 7.0   | 35.0 | 20.0 | [24] |
| Mn-Na/SiO <sub>2</sub>                                                                                    | 800 | 14.0  | 44.0 | 31.0 | [24] |
| Na <sub>2</sub> WO <sub>4</sub> -Mn/SiO <sub>2</sub>                                                      | 800 | 20.0  | 67.0 | 30.0 | [24] |
| Na <sub>2</sub> WO <sub>4</sub> -Ce/SiO <sub>2</sub>                                                      | 800 | 20.0  | 74.0 | 27.0 | [24] |
| TiO <sub>2</sub> -Mn <sub>2</sub> O <sub>3</sub> -Na <sub>2</sub> WO <sub>4</sub> /SiO <sub>2</sub>       | 700 | 16.7  | 73.0 | 23.0 | [25] |
| Na <sub>2</sub> WO <sub>4</sub> -TiO <sub>2</sub> /SiO <sub>2</sub>                                       | 700 | 4.9   | 71.7 | 6.8  | [26] |
| MnO <sub>x</sub> -Na <sub>2</sub> WO <sub>4</sub> /SiO <sub>2</sub>                                       | 770 | 12.4  | 70.4 | 17.6 | [27] |
| Nb-MnO <sub>x</sub> -Na <sub>2</sub> WO <sub>4</sub> /SiO <sub>2</sub>                                    | 770 | 15.2  | 68.2 | 22.3 | [27] |
| Ti-MnO <sub>x</sub> -Na <sub>2</sub> WO <sub>4</sub> /SiO <sub>2</sub>                                    | 770 | 11.2  | 70.4 | 15.9 | [27] |
| Sn-MnO <sub>x</sub> -Na <sub>2</sub> WO <sub>4</sub> /SiO <sub>2</sub>                                    | 770 | 7.5   | 69.5 | 10.8 | [27] |
| Ce-MnO <sub>x</sub> -Na <sub>2</sub> WO <sub>4</sub> /SiO <sub>2</sub>                                    | 770 | 12.7  | 66.7 | 19.0 | [27] |
| Fe-MnO <sub>x</sub> -Na <sub>2</sub> WO <sub>4</sub> /SiO <sub>2</sub>                                    | 770 | 15.8  | 65.5 | 24.1 | [27] |
| Ge-MnO <sub>x</sub> -Na <sub>2</sub> WO <sub>4</sub> /SiO <sub>2</sub>                                    | 770 | 16.4  | 70.7 | 23.2 | [27] |
| Mn <sub>2</sub> O <sub>3</sub> -Na <sub>2</sub> WO <sub>4</sub> /SiC                                      | 800 | 20.5  | 54.5 | 37.5 | [28] |
| Mn <sub>2</sub> O <sub>3</sub> -Na <sub>2</sub> WO <sub>4</sub> /SiO <sub>2</sub>                         | 700 | 23.5  | 60.5 | 39.7 | [29] |
| Na <sub>2</sub> WO <sub>4</sub> -Ti-Mn/SiO <sub>2</sub>                                                   | 700 | 22.1  | 62.3 | 35.4 | [30] |
| Na <sub>2</sub> WO <sub>4</sub> -TiO <sub>2</sub> -MnO <sub>x</sub> -Sr <sub>0.25</sub> /SiO <sub>2</sub> | 750 | 22.9  | 62.5 | 36.6 | [31] |
| (NH <sub>4</sub> ) <sub>2</sub> WO <sub>4</sub> /SiO <sub>2</sub>                                         | 850 | 2.4   | 20   | 12   | [32] |
| Mn/SiO <sub>2</sub>                                                                                       | 850 | 5.29  | 23   | 23   | [32] |
| Mn/Na <sub>2</sub> WO <sub>4</sub> /SiO <sub>2</sub>                                                      | 850 | 8     | 40   | 20   | [32] |
| Sn-W-Mn/SiO <sub>2</sub>                                                                                  | 750 | 20.22 | 68.1 | 29.7 | [32] |
| Ce-Na <sub>2</sub> WO <sub>4</sub> /TiO <sub>2</sub>                                                      | 800 | 26.2  | 52.3 | 50.1 | [33] |
| La-Li-Mn/WO <sub>3</sub> /TiO <sub>2</sub>                                                                | 750 | 19.2  | 64   | 30   | [34] |
| Mn-Na <sub>2</sub> WO <sub>4</sub> /CeO <sub>2</sub> -TiO <sub>2</sub>                                    | 775 | 30.3  | 52.8 | 57.4 | [35] |
| Ce-Mn/Na <sub>2</sub> WO <sub>4</sub> /SiO <sub>2</sub>                                                   | 840 | 16.24 | 65.5 | 24.8 | [12] |
| S-Na-W-Mn-Zr/SiO <sub>2</sub>                                                                             | 750 | 16.18 | 42.7 | 37.9 | [36] |
| S-Na-W-Mn-Zr/SiO <sub>2</sub>                                                                             | 750 | 16.3  | 46.2 | 35.3 | [37] |
| Na <sub>2</sub> WO <sub>4</sub> -Mn/SiO <sub>2</sub>                                                      | 850 | 11.18 | 51.9 | 21.5 | [38] |
| Na <sub>2</sub> WO <sub>4</sub> -Mn/SBA-15                                                                | 850 | 14.78 | 56.2 | 26.3 | [32] |
| MnTiO <sub>3</sub> -Na <sub>2</sub> WO <sub>4</sub> /SBA-15                                               | 750 | 8.84  | 68   | 13   | [39] |
| Mn <sub>x</sub> O <sub>y</sub> -Na <sub>2</sub> WO <sub>4</sub> /TiO <sub>2</sub> -rutile                 | 700 | 24.82 | 63   | 39.4 | [40] |
| Mn <sub>2</sub> O <sub>3</sub> -Na <sub>2</sub> WO <sub>4</sub> /TiO <sub>2</sub> -SiO <sub>2</sub>       | 750 | 2.91  | 42.8 | 6.8  | [19] |
| SiO <sub>2</sub> @MnO <sub>x</sub> @Na <sub>2</sub> WO <sub>4</sub> @SiO <sub>2</sub>                     | 700 | 17.76 | 74   | 24   | [32] |

## References:

- [1] Z. C. Jiang, C.-J. Yu, X.-P. Fang, S.-B. Li, H.-L. Wang, Oxide/support interaction and surface reconstruction in the sodium tungstate ( $\text{Na}_2\text{WO}_4$ )/silica system, *Journal of Physical Chemistry A*, 97 (1993) 12870-12875.
- [2] A. Palermo, J.P.H. Vazquez, M.S. Tikhov, R.M. Lambert, Critical influence of the amorphous silica-to-cristobalite phase transition on the performance of  $\text{Mn}/\text{Na}_2\text{WO}_4/\text{SiO}_2$  catalysts for the oxidative coupling of methane, *Journal of Catalysis*, 177 (1998) 259-266.
- [3] A. Malekzadeh, A. Khodadadi, M. Abedini, M. Amini, A. Bahramian, A.K. Dalai, Correlation of electrical properties and performance of OCM  $\text{MO}_x/\text{Na}_2\text{WO}_4/\text{SiO}_2$  catalysts, *Catalysis Communications*, 2 (2001) 241-247.
- [4] S.-F. Ji, T.-C. Xiao, S.-B. Li, C.-Z. Xu, R.-L. Hou, K.S. Coleman, M.L.H. Green, The relationship between the structure and the performance of  $\text{Na-W-Mn}/\text{SiO}_2$  catalysts for the oxidative coupling of methane, *Applied Catalysis A: General*, 225 (2002) 271-284.
- [5] S. Ji, T. Xiao, S. Li, L. Chou, B. Zhang, C. Xu, R. Hou, A.P.E. York, M.L.H. Green, Surface  $\text{WO}_4$  tetrahedron: The essence of the oxidative coupling of methane over  $\text{M-W-Mn}/\text{SiO}_2$  catalysts, *Journal of Catalysis*, 220 (2003) 47-56.
- [6] J. Wang, L. Chou, B. Zhang, H. Song, J. Zhao, J. Yang, S. Li, Comparative study on oxidation of methane to ethane and ethylene over  $\text{Na}_2\text{WO}_4\text{-Mn}/\text{SiO}_2$  catalysts prepared by different methods, *J Mol Catal A-Chem*, 245 (2006) 272-277.
- [7] A. Malekzadeh, A. Khodadadi, A.K. Dalai, M. Abedini, Oxidative coupling of methane over lithium doped ( $\text{Mn+W}/\text{SiO}_2$ ) catalysts, *Journal of Natural Gas Chemistry*, 16 (2007) 121-129.
- [8] J. Wu, H. Zhang, S. Qin, C. Hu, La-promoted  $\text{Na}_2\text{WO}_4/\text{Mn}/\text{SiO}_2$  catalysts for the oxidative conversion of methane simultaneously to ethylene and carbon monoxide, *Applied Catalysis A: General*, 323 (2007) 126-134.
- [9] Y.T. Chua, A.R. Mohamed, S. Bhatia, Oxidative coupling of methane for the production of ethylene over sodium-tungsten-manganese-supported-silica catalyst ( $\text{Na-W-Mn}/\text{SiO}_2$ ), *Applied Catalysis A: General*, 343 (2008) 142-148.
- [10] Z. Gholipour, A. Malekzadeh, R. Hatami, Y. Mortazavi, A. Khodadadi, Oxidative coupling of methane over ( $\text{Na}_2\text{WO}_4\text{+Mn}$  or  $\text{Ce}/\text{SiO}_2$ ) catalysts: In situ measurement of electrical conductivity, *Journal of Natural Gas Chemistry*, 19 (2010) 35-42.
- [11] S. Mahmoodi, M.R. Ehsani, S.M. Ghoreishi, Effect of promoter in the oxidative coupling of methane over synthesized  $\text{Mn}/\text{SiO}_2$  nanocatalysts via incipient wetness impregnation, *Journal of Industrial and Engineering Chemistry*, 16 (2010) 923-928.
- [12] S.M.K. Shahri, A.N. Pour, Ce-promoted  $\text{Mn}/\text{Na}_2\text{WO}_4/\text{SiO}_2$  catalyst for oxidative coupling of methane at atmospheric pressure, *Journal of Natural Gas Chemistry*, 19 (2010) 47-53.
- [13] J.Y. Lee, W. Jeon, J.-W. Choi, Y.-W. Suh, J.-M. Ha, D.J. Suh, Y.-K. Park, Scaled-up production of  $\text{C}_2$  hydrocarbons by the oxidative coupling of methane over pelletized  $\text{Na}_2\text{WO}_4/\text{Mn}/\text{SiO}_2$  catalysts: Observing hot spots for the selective process, *Fuel*, 106 (2013) 851-857.
- [14] H.R. Godini, A. Gili, O. Görke, S. Arndt, U. Simon, A. Thomas, R. Schomäcker, G. Wozny, Sol-gel method for synthesis of  $\text{Mn-Na}_2\text{WO}_4/\text{SiO}_2$  catalyst for methane oxidative coupling, *Catalysis Today*, 236 (2014) 12-22.
- [15] T.W. Elkins, H.E. Hagelin-Weaver, Characterization of  $\text{Mn-Na}_2\text{WO}_4/\text{SiO}_2$  and  $\text{Mn-Na}_2\text{WO}_4/\text{MgO}$  catalysts for the oxidative coupling of methane, *Applied Catalysis A: General*, 497 (2015) 96-106.
- [16] N. Hiyoshi, T. Ikeda, Oxidative coupling of methane over alkali chloride- $\text{Mn-Na}_2\text{WO}_4/\text{SiO}_2$  catalysts: Promoting effect of molten alkali chloride, *Fuel Processing Technology*, 133 (2015) 29-34.



- [17] M. Yildiz, Y. Aksu, U. Simon, T. Otremba, K. Kailasam, C. Göbel, F. Girgsdies, O. Görke, F. Rosowski, A. Thomas, R. Schomäcker, S. Arndt, Silica material variation for the  $Mn_xO_y$ - $Na_2WO_4/SiO_2$ , *Applied Catalysis A: General*, 525 (2016) 168-179.
- [18] V. Fleischer, R. Steuer, S. Parishan, R. Schomäcker, Investigation of the surface reaction network of the oxidative coupling of methane over  $Na_2WO_4/Mn/SiO_2$  catalyst by temperature programmed and dynamic experiments, *Journal of Catalysis*, 341 (2016) 91-103.
- [19] P. Wang, G. Zhao, Y. Liu, Y. Lu,  $TiO_2$ -doped  $Mn_2O_3$ - $Na_2WO_4/SiO_2$  catalyst for oxidative coupling of methane: Solution combustion synthesis and  $MnTiO_3$ -dependent low-temperature activity improvement, *Applied Catalysis A: General*, 544 (2017) 77-83.
- [20] P. Wang, G. Zhao, Y. Wang, Y. Lu,  $MnTiO_3$ -driven low-temperature oxidative coupling of methane over  $TiO_2$ -doped  $Mn_2O_3$ - $Na_2WO_4/SiO_2$  catalyst, *Science Advances*, 3 (2017) e1603180.
- [21] R.T. Yunarti, S. Gu, J.-W. Choi, J. Jae, D.J. Suh, J.-M. Ha, Oxidative coupling of methane using  $Mg/Ti$ -doped  $SiO_2$ -supported  $Na_2WO_4/Mn$  catalysts, *ACS Sustainable Chemistry & Engineering*, 5 (2017) 3667-3674.
- [22] C. Uzunoglu, A. Leba, R. Yildirim, Oxidative coupling of methane over  $Mn$ - $Na_2WO_4$  catalyst supported by monolithic  $SiO_2$ , *Applied Catalysis A: General*, 547 (2017) 22-29.
- [23] N.S. Hayek, N.S. Lucas, C.W. Damouny, O.M. Gazit, Critical surface parameters for the oxidative coupling of methane over the  $Mn$ - $Na$ - $W/SiO_2$  catalyst, *ACS Appl Mater Interfaces*, 9 (2017) 40404-40411.
- [24] S. Gu, H.-S. Oh, J.-W. Choi, D.J. Suh, J. Jae, J. Choi, J.-M. Ha, Effects of metal or metal oxide additives on oxidative coupling of methane using  $Na_2WO_4/SiO_2$  catalysts: Reducibility of metal additives to manipulate the catalytic activity, *Applied Catalysis A: General*, 562 (2018) 114-119.
- [25] P. Wang, X. Zhang, G. Zhao, Y. Liu, Y. Lu, Oxidative coupling of methane:  $MO_x$ -modified ( $M=Ti, Mg, Ga, Zr$ )  $Mn_2O_3$ - $Na_2WO_4/SiO_2$  catalysts and effect of  $MO_x$  modification, *Chinese Journal of Catalysis*, 39 (2018) 1395-1402.
- [26] A. Seubsai, P. Tiencharoenwong, P. Kidamorn, C. Niamnuy, Synthesis of light hydrocarbons via oxidative coupling of methane over silica-supported  $Na_2WO_4$ - $TiO_2$  catalyst, *Engineering Journal*, 23 (2019) 169-182.
- [27] N.S. Hayek, G.J. Khelif, F. Horani, O.M. Gazit, Effect of reaction conditions on the oxidative coupling of methane over doped  $MnO_x$ - $Na_2WO_4/SiO_2$  catalyst, *Journal of Catalysis*, 376 (2019) 25-31.
- [28] J. Kim, L.-H. Park, J.-M. Ha, E.D. Park, Oxidative coupling of methane over  $Mn_2O_3$ - $Na_2WO_4/SiC$  catalysts, *Catalysts*, 9 (2019).
- [29] T. Chukeaw, S. Sringam, M. Chareonpanich, A. Seubsai, Screening of single and binary catalysts for oxidative coupling of methane to value-added chemicals, *Molecular Catalysis*, 470 (2019) 40-47.
- [30] S. Sringam, P. Kidamorn, T. Chukeaw, M. Chareonpanich, A. Seubsai, Investigation of metal oxide additives onto  $Na_2WO_4$ - $Ti/SiO_2$  catalysts for oxidative coupling of methane to value-added chemicals, *Catalysis Today*, 358 (2020) 263-269.
- [31] P. Kidamorn, W. Tiyatha, T. Chukeaw, C. Niamnuy, M. Chareonpanich, H. Sohn, A. Seubsai, Synthesis of value-added chemicals via oxidative coupling of methanes over  $Na_2WO_4$ - $TiO_2$ - $MnO_x/SiO_2$  catalysts with alkali or alkali earth oxide additives, *ACS Omega*, 5 (2020) 13612-13620.
- [32] J. Liu, J. Yue, M. Lv, F. Wang, Y. Cui, Z. Zhang, G. Xu, From fundamentals to chemical engineering on oxidative coupling of methane for ethylene production: A review, *Carbon Resources Conversion*, 5 (2022) 1-14.
- [33] V. Jodaian, M. Mirzaei, Ce-promoted  $Na_2WO_4/TiO_2$  catalysts for the oxidative coupling of methane, *Inorganic Chemistry Communications*, 100 (2019) 97-100.
- [34] F. Cheng, J. Yang, L. Yan, J. Zhao, H. Zhao, H. Song, L.J. Chou, Enhancement of  $La_2O_3$  to  $Li$ - $Mn/WO_3/TiO_2$  for oxidative coupling of methane, *Journal of Rare Earths*, 38 (2020) 167-174.

- [35] G.J. Kim, J.T. Ausenbaugh, H.T. Hwang, Effect of TiO<sub>2</sub> on the Performance of Mn/Na<sub>2</sub>WO<sub>4</sub> Catalysts in Oxidative Coupling of Methane, *Industrial & Engineering Chemistry Research*, 60 (2021) 3914-3921.
- [36] W. Zheng, D. Cheng, N. Zhu, F. Chen, X. Zhan, Studies on the structure and catalytic performance of S and P promoted Na-W-Mn-Zr/SiO<sub>2</sub> catalyst for oxidative coupling of methane, *Journal of Natural Gas Chemistry*, 19 (2010) 15-20.
- [37] W. Zheng, D. Cheng, F. Chen, X. Zhan, Characterization and catalytic behavior of Na-W-Mn-Zr-S-P/SiO<sub>2</sub> prepared by different methods in oxidative coupling of methane, *Journal of Natural Gas Chemistry*, 19 (2010) 515-521.
- [38] H. Liu, D. Yang, R. Gao, L. Chen, S. Zhang, X. Wang, A novel Na<sub>2</sub>WO<sub>4</sub>-Mn/SiC monolithic foam catalyst with improved thermal properties for the oxidative coupling of methane, *Catalysis Communications*, 9 (2008) 1302-1306.
- [39] T. Chukeaw, W. Tiyatha, K. Jaroenpanon, T. Witoon, P. Kongkachuichay, M. Chareonpanich, K. Faungnawakij, N. Yigit, G. Rupprechter, A. Seubsai, Synthesis of value-added hydrocarbons via oxidative coupling of methane over MnTiO<sub>3</sub>-Na<sub>2</sub>WO<sub>4</sub>/SBA-15 catalysts, *Process Safety and Environmental Protection*, 148 (2021) 1110-1122.
- [40] M. Yıldız, Mesoporous TiO<sub>2</sub>-rutile supported Mn<sub>x</sub>O<sub>y</sub>-Na<sub>2</sub>WO<sub>4</sub>: Preparation, characterization and catalytic performance in the oxidative coupling of methane, *Journal of Industrial and Engineering Chemistry*, 76 (2019) 488-499.
